# Supplementary material
Source: PubMed Central journal article supplement (PMC4649199)
Supplement: AAC.02204-15_zac012154647so1.pdf [file AAC.02204-15_zac012154647so1.pdf]

## SUPPLEMENTARY DATA

**Supplementary Table 1:** primers used for qPCR

| Primer name | Sequence              | Origin ( <i>C. lusitaniae</i> , Broad Institute) <sup>a)</sup> | Reference  |
|-------------|-----------------------|----------------------------------------------------------------|------------|
| MFS7-R      | GGAATGTAAGGCATGGCAGT  | supercont_1.2 (1458215-1459123)                                | (1)        |
| MFS7-F      | ATGGTTTTCTCGCCAATGTC  | supercont_1.2 (1458215-1459123)                                | (1)        |
| ABC12-R     | GTGCTTCAACCACCACCTTT  | supercont_1.3 (1264183-1268415)                                | (1)        |
| ABC12-F     | TGATTGAGTCTGCGGACAAG  | supercont_1.3 (1264183-1268415)                                | (1)        |
| ABC15-F     | GTGCTAAGGCGTTTTTCGAG  | supercont_1.3 (1682175-1688644)                                | This study |
| ABC15-R     | TGAGATGCACGCCAGTAGTC  | supercont_1.3 (1682175-1688644)                                | This study |
| ABC9-F      | TCCATTGCAGAGGCTTCTTT  | supercont_1.2 (1950802-1957241)                                | This study |
| ABC9-R      | GTACGCATCCTGGGAACACT  | supercont_1.2 (1950802-1957241)                                | This study |
| ACT1-F      | GTATCGCTGAGCGTATGCAA  | supercont_1.4 (88657-89739)                                    | This study |
| ACT1-R      | GATGGATGGTCCAGACTCGT  | supercont_1.4 (88657-89739)                                    | This study |
| ERG11-F     | AACACCAGCTACGTGGTTCC  | supercont_1.6 (218130-219707)                                  | This study |
| ERG11-R     | AGGCAAACCTGCTCTCCGATA | supercont_1.6 (218130-219707)                                  | This study |

<sup>a)</sup> :Numbering gives the coordinates of the gene of interest according to supercontig data

**Supplementary Table 2:** primers used for CRISP-Cas9 system

| Primer Name                                                 | Sequence                                                                                                                                                                                                                                                                                                | Purpose                                                                                             |
|-------------------------------------------------------------|---------------------------------------------------------------------------------------------------------------------------------------------------------------------------------------------------------------------------------------------------------------------------------------------------------|-----------------------------------------------------------------------------------------------------|
| FKS_crisp_R <sup>a)</sup><br><br>FKS_crisp_F                | GTTGATAACGGACTAGCCTTATTTAACTTG<br>CTATTTCTAGCTCTAAAACA <u>AATATTCAGAAT</u><br><u>CGTACTACGATCATT</u> TATCTTTCACTGCGGA<br>GAAGTTTCGAACGCCGAAACATGCGCA<br><br>TGCGCATGTTTCGGCGTTCGAAACTTCTCCG<br>CAGTGAAAGATAAATGATCGTAGTACGATT<br><u>CTGAATATTGTTTTAGAGCTAGAAATAGCA</u><br>AGTTAAAATAAGGCTAGTCCGTTATCAAC | Generation of<br>guide-pMEL10<br>sequence by<br>complementary<br>assembly of<br>primers             |
| FKS left arm_S636Y <sup>b)</sup><br><br>FKS right arm_S636Y | GATAGATGGATGTCCTATTTAGTTTGGGTTA<br>CTGTTTTTGCTGCCAAATATTCAGAAT <b>ATTAC</b><br><i>TACTTTTTAG</i><br><br>CATTGCAGTGGTGGACAAAATTCTAATTGG<br>ATCTCTCAAAGATAAA <b>ACTAAAAAGTAGTAAT</b><br><i>ATTCT</i>                                                                                                      | Generation of<br>repair fragment for<br>S636Y by<br>overlapping PCR                                 |
| FKS left arm<br><br>FKS right arm_S643Y                     | GATAGATGGATGTCCTATTTAGTTTGGGTTA<br>CTGTTTTTGCTGCCAAATATTCAGAAT <b>CGTAC</b><br><i>TACTTTTTAG</i><br><br>CATTGCAGTGGTGGACAAAATTCTAATTGG<br>ATCTCTCAAATATAAA <b>ACTAAAAAGTAGTAC</b><br><i>GATTCT</i>                                                                                                      | Generation of<br>repair fragment for<br>S643Y by<br>overlapping PCR                                 |
| FKS right arm S643P                                         | CATTGCAGTGGTGGACAAAATTCTAATTGG<br>ATCTCTCAAAG <b>GTA</b> AA <b>ACTAAAAAGTAGTA</b><br>CGATTCT                                                                                                                                                                                                            | Generation of<br>repair fragment for<br>S643P by<br>overlapping PCR<br>using primer FKS<br>left arm |
| FKS1verif left<br><br>FKS1verif right                       | TCTACAAGGCGTTATGTTGCAT<br><br>CAATCTTGGGTTGCACTTTACA                                                                                                                                                                                                                                                    | <i>FKS1</i> verification<br>primers                                                                 |
| p426 CRISPR rv<br><br>p426 CRISPR fw                        | GATCATTTATCTTTCACTGCGGAGAAG<br><br>GTTTTAGAGCTAGAAATAGCAAGTTAAAAT<br>AAGGCTAGTC                                                                                                                                                                                                                         | Inverse PCR with<br>pMEL10                                                                          |

a) The 20 nt sequence of the *FKSI* guide is underlined

b) Sequences in italics are overlapping sequences; Bold characters indicate mutated bases

**Supplementary Table 3 : *S. cerevisiae* strain descriptions**

| Strain number | Parent       | Genotype                                                                   | Reference  |
|---------------|--------------|----------------------------------------------------------------------------|------------|
| IMX581        | CEN.PK113-5D | <i>MATa ura3-52 can1Δ::cas9-natNT2 TRP1 LEU2 HIS3 FKS1</i>                 | (2)        |
| DSY4762       | IMX581       | <i>MATa ura3-52 can1Δ::cas9-natNT2 TRP1 LEU2 HIS3 FKS1<sup>S636Y</sup></i> | This study |
| DSY4763       | IMX581       | <i>MATa ura3-52 can1Δ::cas9-natNT2 TRP1 LEU2 HIS3 FKS1<sup>S643P</sup></i> | This study |
| DSY4764       | IMX581       | <i>MATa ura3-52 can1Δ::cas9-natNT2 TRP1 LEU2 HIS3 FKS1<sup>S643Y</sup></i> | This study |

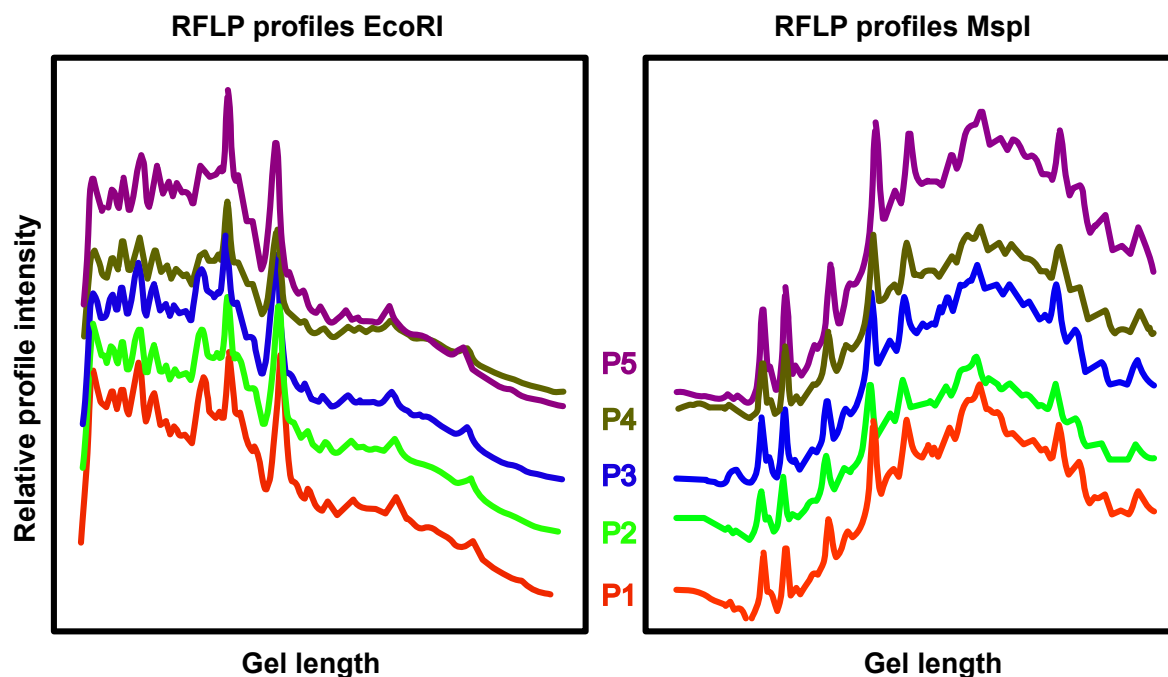

**Supplementary Figure 1** : Profile plots of RFLP analysis. Gel electrophoresis pictures of Fig.2. were analysed with the ImageJ (version 1.49P) and profile plots were generated. The X-axis represents relative densities while Y-axis represents length of profiles.

## References

- (1) **Reboutier D, Piednoel M, Boisnard S, Conti A, Chevalier V, Florent M, Gibot-Leclerc S, Da Silva B, Chastin C, Fallague K, Favel A, Noel T, Ruprich-Robert G, Chapeland-Leclerc F, Papon N.** 2009. Combination of different molecular mechanisms leading to fluconazole resistance in a *Candida lusitanae* clinical isolate. *Diagn Microbiol Infect Dis* **63**:188-193.
- (2) **Mans R, van Rossum HM, Wijsman M, Backx A, Kuijpers NG, van den Broek M, Daran-Lapujade P, Pronk JT, van Maris AJ, Daran JM.** 2015. CRISPR/Cas9: a molecular Swiss army knife for simultaneous introduction of multiple genetic modifications in *Saccharomyces cerevisiae*. *FEMS Yeast Res* **15**:fov004-fov004.
